# Supplementary material for: Fermi level position, Coulomb gap and Dresselhaus splitting in (Ga,Mn)As
Source: Springer Nature journal article supplement (doi:10.1038/srep27266), 2016-06-06
Supplement: 41598_2016_BFsrep27266_MOESM1_ESM.pdf [file 41598_2016_BFsrep27266_MOESM1_ESM.pdf]

## SUPPLEMENTARY INFORMATION

### **Fermi level position, Coulomb gap, and Dresselhaus splitting in (Ga,Mn)As**

S. Souma<sup>1</sup>, L. Chen<sup>1</sup>, R. Oszwaldowski<sup>2</sup>, T. Sato<sup>3</sup>, F. Matsukura<sup>1,4,5</sup>, T. Dietl<sup>1,6,7</sup>, H. Ohno<sup>1,4,5</sup>, & T. Takahashi<sup>1,3</sup>.

<sup>1</sup>*WPI Research Center, Advanced Institute for Materials Research, Tohoku University, 2-1-1 Katahira, Aoba-ku, Sendai 980-8577, Japan*

<sup>2</sup>*Department of Physics, South Dakota School of Mines and Technology, Rapid City, SD 57701, USA*

<sup>3</sup>*Department of Physics, 6-3 Aramaki Aza-Aoba, Aoba-ku, Tohoku University, Sendai 980-8578, Japan*

<sup>4</sup>*Center for Spintronics Integrated Systems, Tohoku University, 2-1-1 Katahira, Aoba-ku, Sendai 980-8577, Japan*

<sup>5</sup>*Laboratory for Nanoelectronics and Spintronics, Research Institute of Electrical Communication, Tohoku University, 2-1-1 Katahira, Aoba-ku, Sendai 980-8577, Japan*

<sup>6</sup>*Institute of Physics, Polish Academy of Sciences, aleja Lotników 32/46, PL-02-668 Warszawa, Poland*

<sup>7</sup>*Institute of Theoretical Physics, Faculty of Physics, University of Warsaw, ulica Pasteura 5, PL-02-093 Warszawa, Poland.*

#### 1. Band assignment of GaAs and photoelectron matrix-element effect

We observed a strong selection rule of photoelectron intensity<sup>40</sup> (*i.e.* photoemission matrix-element effect) in the ARPES data of GaAs and (Ga,Mn)As. As displayed in Fig. S1a, when the polarization vector of monochromatized He-I $\alpha$  resonance line points perpendicular to the measured  $\bar{\Gamma}\bar{X}$  cut (see inset), both the light hole (LH) and heavy hole (HH) bands are well resolved, particularly in high binding-energy region, while the intensity of the split-off (SO) band appears to be very weak. On the other hand, when the polarization vector is aligned parallel to the  $\bar{\Gamma}\bar{X}$  cut as shown in Fig. S1b, the SO band appear to be more visible, while the LH/HH bands become dimmer. This characteristic polarization dependence of ARPES intensity is consistent with the previous report of soft-x-ray ARPES on (Ga,Mn)As<sup>23</sup>.

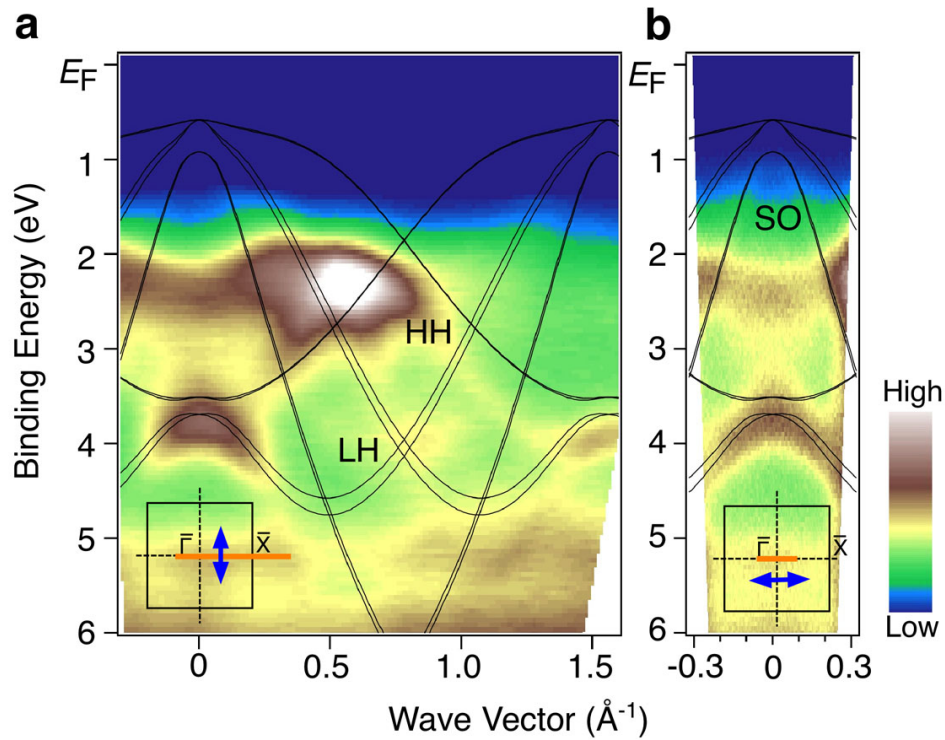

**Figure S1 | Light-polarization dependence of ARPES intensity of GaAs.** **a**, ARPES intensity of GaAs (n-type; Si-doped) measured along the  $\Gamma\bar{X}$  cut by setting the polarization vector of incident light perpendicular to the measured cut (see arrow in inset). **b**, ARPES intensity of GaAs measured with the polarization vector parallel to the measured cut (inset). Calculated band structure of GaAs within the tight-binding approximation (same as Fig. 1e) is overlaid by solid curves in **a** and **b**.
